# Supplementary figures and images for: How an ACE2 mimicking epitope-MIP nanofilm recognizes template-related peptides and the receptor binding domain of SARS-CoV-2
Source: Royal Society of Chemistry journal article supplement (doi:10.1039/d2nr03898f), 2022-01-01

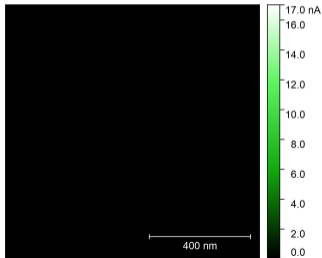

Supplement: d2nr03898f10.pdf [file d2nr03898f10.pdf]

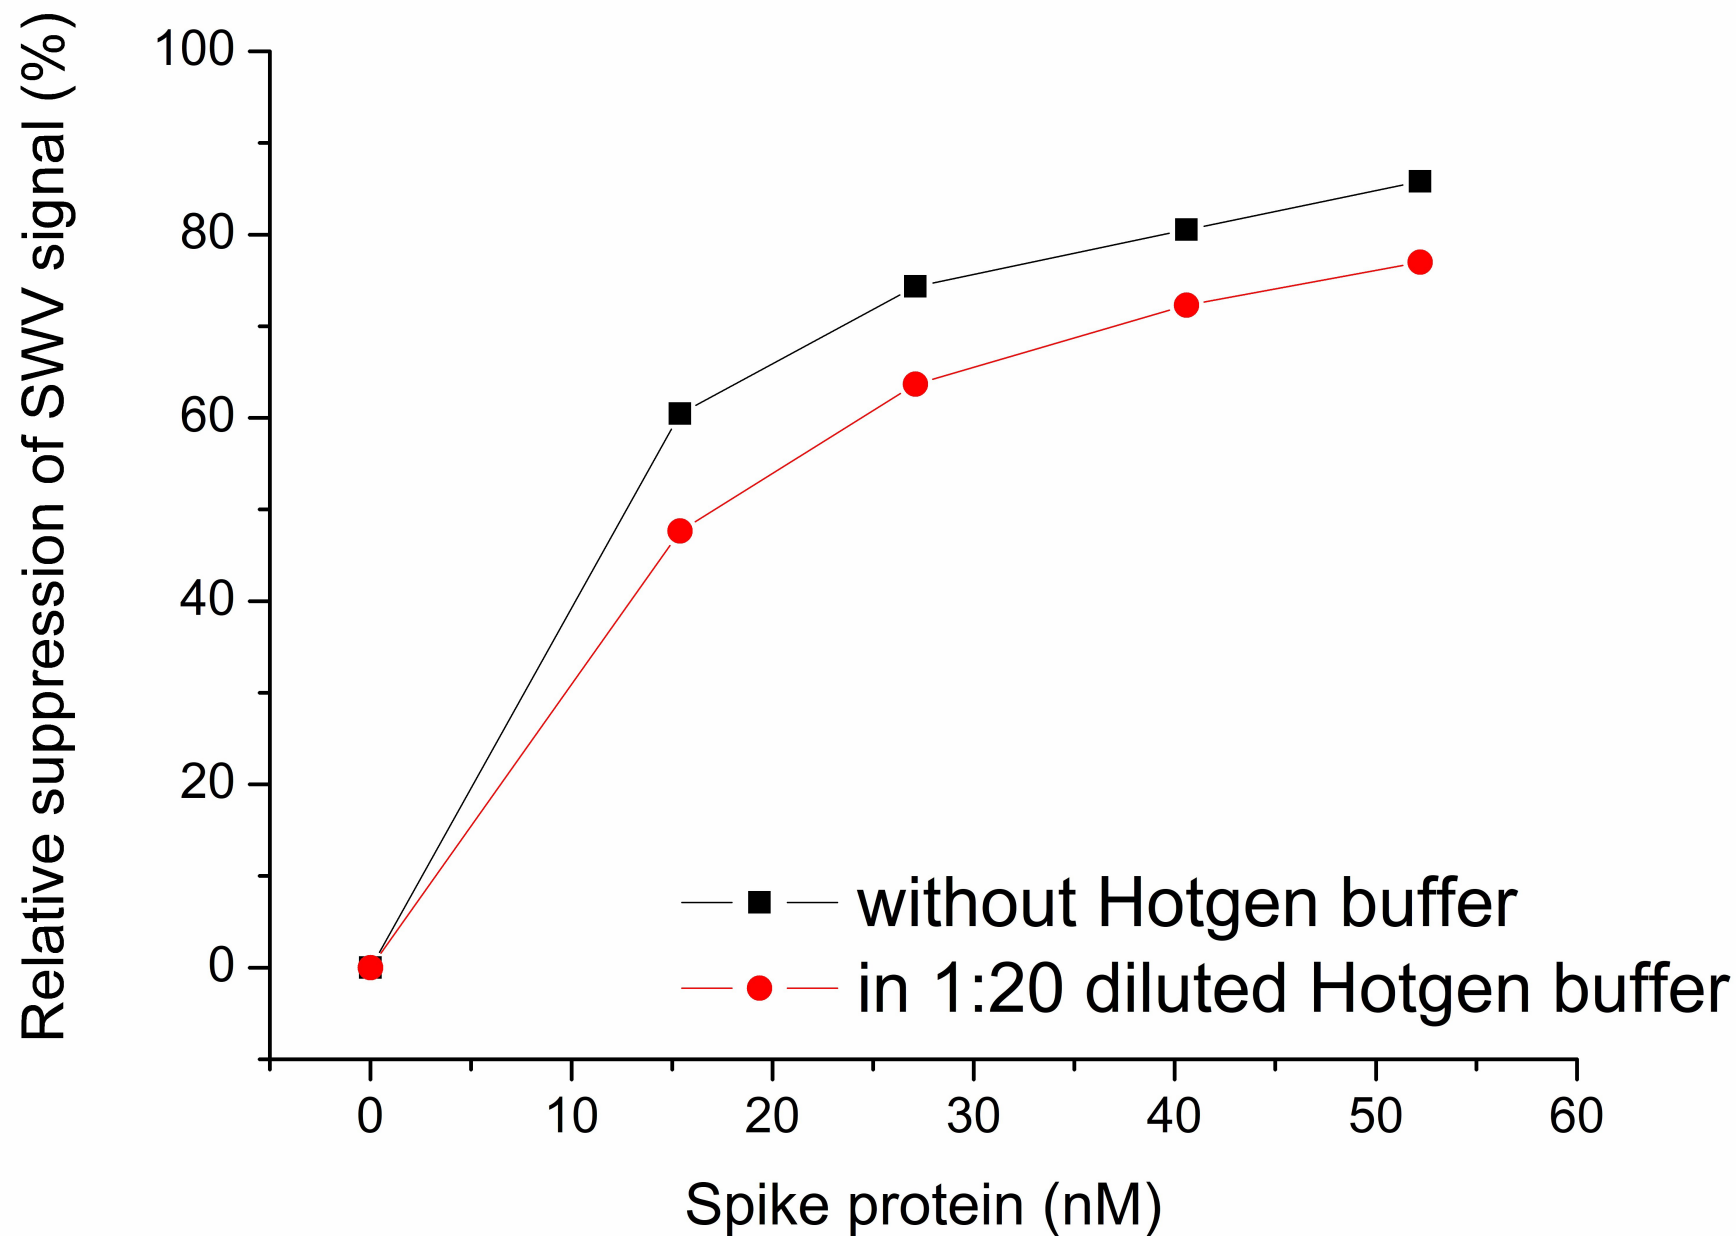

Supplement: d2nr03898f5.pdf [file d2nr03898f5.pdf]

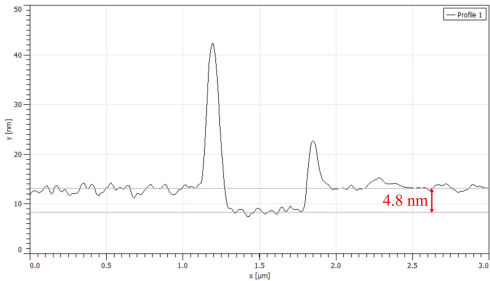

Supplement: d2nr03898f7.pdf [file d2nr03898f7.pdf]

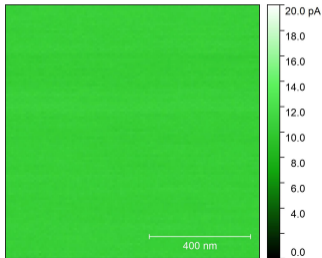

Supplement: d2nr03898f9.pdf [file d2nr03898f9.pdf]
